# Supplementary material for: Tongnao Decoction (TND) Alleviated Atherosclerosis by Playing Lowering Lipid, Anti‐Inflammatory, and Antioxidant Roles
Source: Hindawi journal article supplement (doi:10.1155/2022/6061197), 2022-01-01
Supplement: f1 [file 6061197.f1.pdf]

---

| <b>Compositions</b>                   | <b>Percentage (%)</b> |
|---------------------------------------|-----------------------|
| Ramulus Uncariae Cum Uncis            | 30                    |
| Radix et Rhizoma Rhodiolae Crenulatae | 15                    |
| Rhizoma chuanxiong                    | 10                    |
| Rhizoma arisaematis                   | 10                    |
| Rhizoma Anemones altaicae             | 10                    |
| Rhizoma Gastrodiae                    | 10                    |
| Bombyx batryticatus                   | 10                    |
| Hirudo                                | 5                     |

---

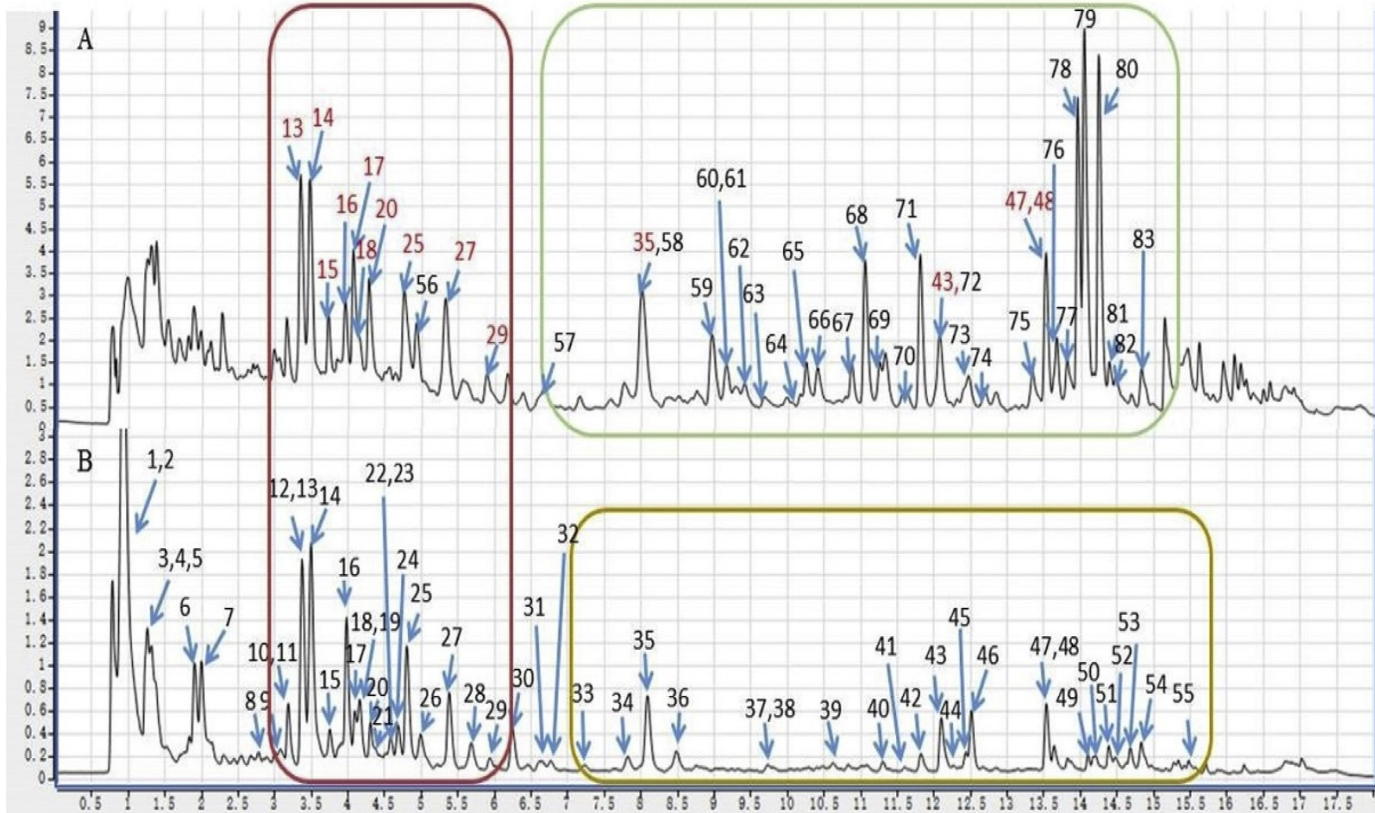

1.Sucrose  
2.Quinic acid  
3.Vanillic acid  
4.Citric acid  
5.2-Hydroxy-4-methylvaleric acid  
6.Gastrodin  
7.Gallic acid  
8.Parishin E  
9.Dihydroxybenzoic acid  
10.NeoChlorogenic acid

11.Nonioside A  
12.Methyl-galloylgalactarate  
13.Salidroside  
14.Crenuatio  
15.S-(4-hydroxybenzyl)-glutathione

16.Chlorogenic acid  
17.Creoside I

18.Crypto chlorogenic acid  
19.Catechin  
20.Creoside I  
21.Tri-O-galloyl-glucose  
22.Creoside II  
23.Vanillic acid  
24.Caffeic acid  
25.Parishin B  
26.Catechin  
27.Parishin C  
28.galloyl-salidroside  
29.Paeoniflorin  
30.unknown  
31.Coumaric acid  
32.Glucopyranosyl-hydroxyvincoside lactam glucoside/isomer  
33.Tetra-O-galloyl-glucose  
34.Rutin

35.Parishin A  
36.Epigallocatechin gallate  
37.unknown  
38.Penta-galloylglucose  
39.unknown  
40.Rhodosin  
41.unknown  
42.Epicatechin  
43.Rhodosin/isomer  
44.Nepitrin  
45.Salvianolic acid B  
46.Quercitrin  
47.Rhodiioctanoside  
48.Rhodiolatuntoside  
49.unknown  
50.unknown  
51.unknown

52.unknown  
53.unknown  
54.unknown  
55.Methoxy-tetrahydronaphthalenecarboxylic acid  
56.Dihydro-O-demethyl-O-β-D-glucopyranosyl hirsutine  
57.Glucopyranosyl-hydroxyvincoside lactam glucoside  
58.Cadambine  
59.3α-Dihydrocadambine  
60.Isorhynchophyllinic acid  
61.3α-Dihydrocadambine/isomer  
62.Dihydro-demethylhirsutine  
63.23-O-Demethylhirsutine  
64.Rhynchophyllinic acid  
65.Isocorynoxine  
66.Demethyl-glucopyranosyl-isocorynoxine  
67.Rhynchophylline  
68.Corynoxine

69.Demethylhirsutine/isomer  
70.Dihydro-demethylhirsutine/isomer  
71.Isorhynchophylline  
72.Demethylhirsuteine/isomer  
73.Ajmalicine/isomer  
74.Ajmalicine/isomer  
75.Ajmalicine/isomer  
76.Demethylhirsutine/isomer  
77.Hirsuteine  
78.Geissoschizine methyl  
79.Corynantheine  
80.Hirsutine  
81.Strictosamide  
82.Vallesiachotamine/isomer  
83.Ajmalicine/isomer

**Sham**

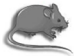

**Chow diet**

**12 Week**

**AS**

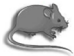

**Carotid-injury+Western diet**

**Carotid-injury + Western diet+TND (1mg/kg per day)**

**AS+TND**

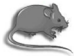

Oil red staining  
Immunofluorescent staining  
Lipid profiles  
Inflammatory factors
